# Supplementary material for: Na2Cu2TeO6: a potential material for high solar cell efficiency and superior energy-harvesting performance
Source: Royal Society of Chemistry journal article supplement (doi:10.1039/d6ra00090h), 2026-04-10
Supplement: d6ra00090h1.pdf [file d6ra00090h1.pdf]

## Supporting Information

### **Na<sub>2</sub>Cu<sub>2</sub>TeO<sub>6</sub>: A Potential Material for High Solar Cell Efficiency and Superior Energy-Harvesting Performance**

Usma Shahzadi<sup>1</sup>, Muhammad Bin Javed<sup>1</sup>, Hafiz Tauqeer Ali<sup>2</sup>, Bassem F. Felemban<sup>2</sup>, and S. Nazir<sup>1\*</sup>

<sup>1</sup>*Department of Physics, University of Sargodha, 40100 Sargodha, Pakistan and*

<sup>2</sup>*Department of Mechanical Engineering, College of Engineering, Taif University, Kingdom of Saudi Arabia*

---

\* Electronic address: [safdar.nazir@uos.edu.pk](mailto:safdar.nazir@uos.edu.pk), Tel: +92-334-971-9060

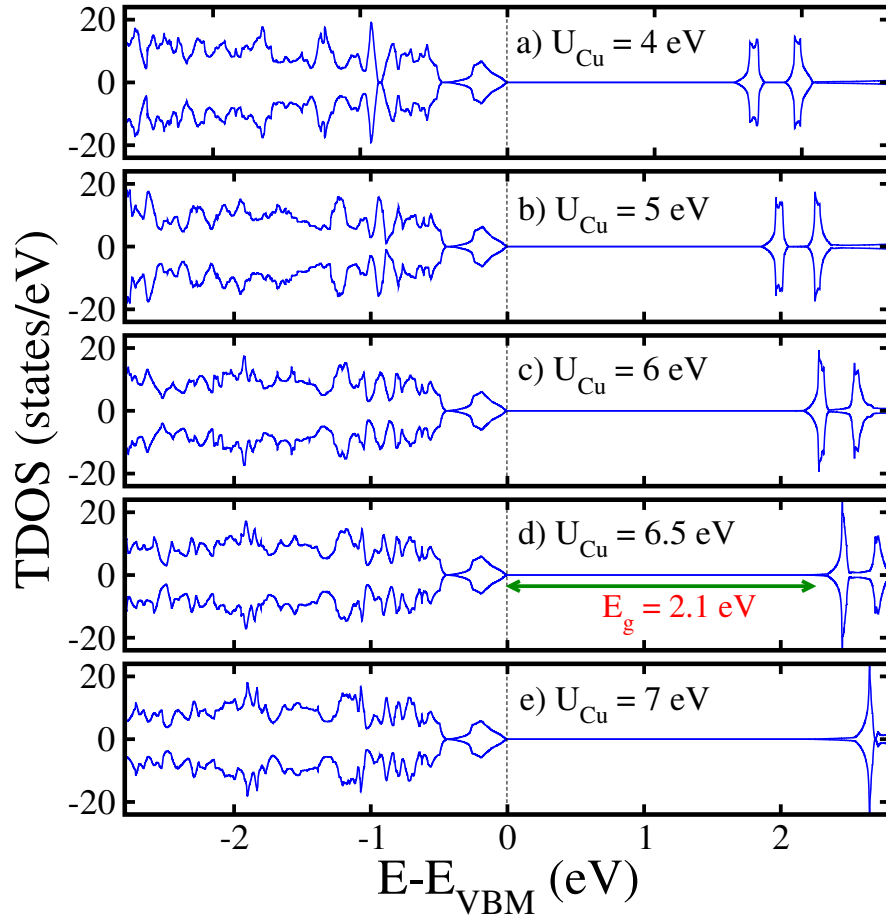

FIG. 1S: GGA+ $U$  calculated spin-polarized total density of states (TDOS) for  $U =$  (a) 4, (b) 5, (c) 6, (d) 6.5, and (e) 7 eV for the  $\text{Na}_2\text{Cu}_2\text{TeO}_6$  material in the stable antiferromagnetic state.

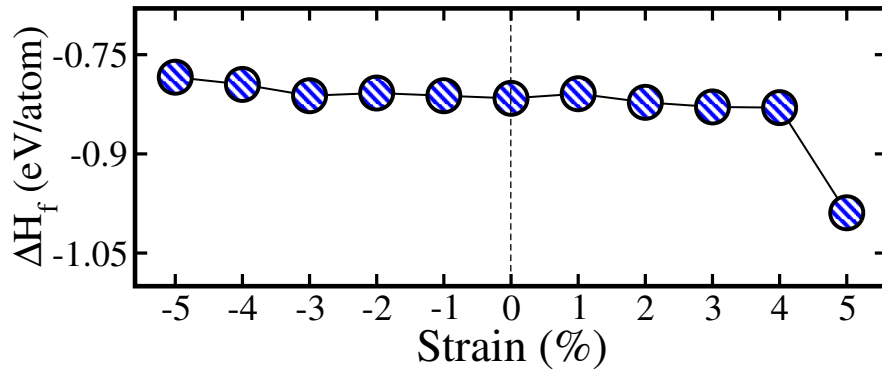

FIG. 2S: GGA+ $U$  calculated formation enthalpy ( $\Delta H_f$ ) for the  $\text{Na}_2\text{Cu}_2\text{TeO}_6$  material against  $\pm 5\%$  biaxial ([110]) strain.

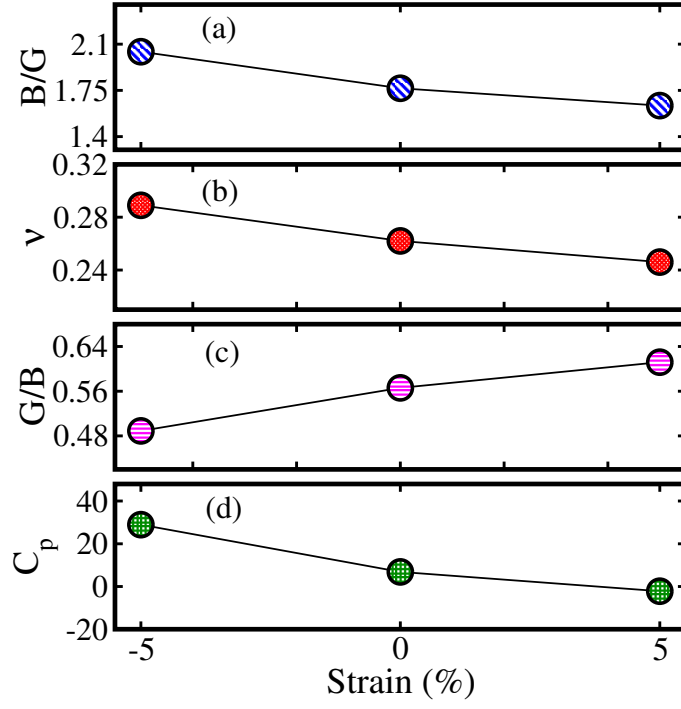

FIG. 3S: Computed (a) Pugh's ratio ( $\frac{B}{G}$ ), (b) Poisson's ratio ( $\nu$ ), (c)  $\frac{G}{B}$ , (d) Cauchy's pressure ( $C_p$ ) of the  $\text{Na}_2\text{Cu}_2\text{TeO}_6$  material under  $-5\%/0\%/+5\%$  strain.

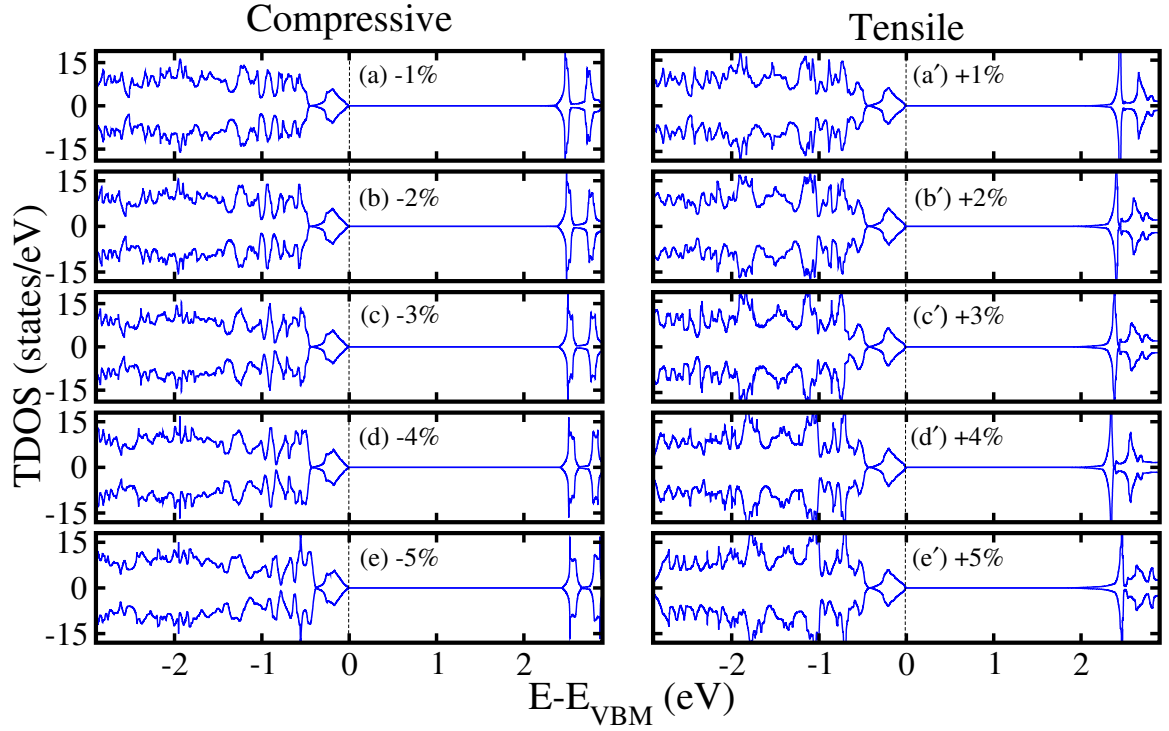

FIG. 4S: GGA+ $U$  calculated spin-polarized total density of states (TDOS) under compressive/tensile strain for the (a/a')  $-1/+1\%$ , (b/b')  $-2/+2\%$ , (c/c')  $-3/+3\%$ , (d/d')  $-4/+4\%$ , and (e/e')  $-5/+5\%$  of the  $\text{Na}_2\text{Cu}_2\text{TeO}_6$  material in the stable antiferromagnetic state.

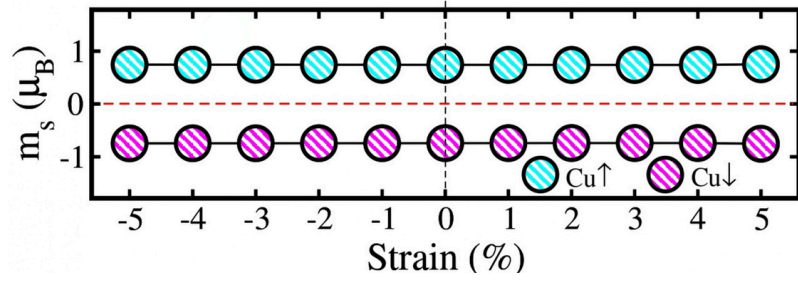

FIG. 5S: GGA+ $U$  calculated local spin magnetic moment ( $m_s$ ) on the Cu ions of the  $\text{Na}_2\text{Cu}_2\text{TeO}_6$  material against  $\pm 5\%$  biaxial ([110]) strain.

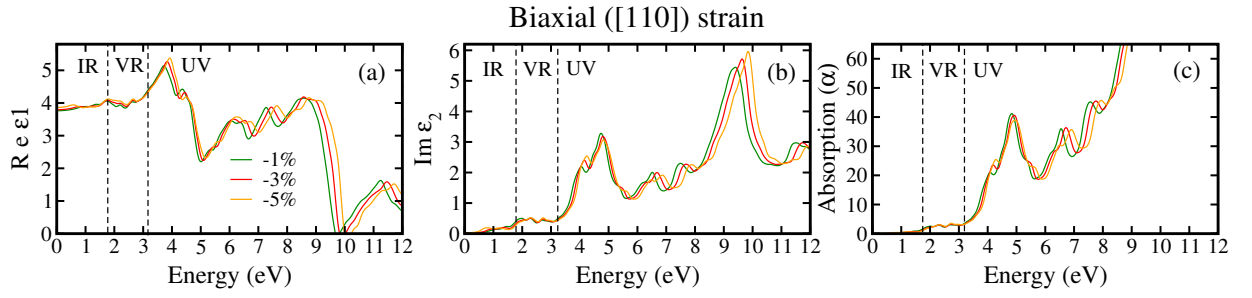

FIG. 6S: Calculated various optical parameters such as (a) real dielectric part ( $\epsilon_1(\omega)$ ), (b) imaginary dielectric part ( $\epsilon_2(\omega)$ ), and (c) absorption coefficient ( $\alpha(\omega)$ ) in  $10^4 \text{ cm}^{-1}$  under  $-1\%/ -3\%/ -5\%$  biaxial ([110]) strain for the  $\text{Na}_2\text{Cu}_2\text{TeO}_6$  material.
